# Supplementary material
Source: PubMed Central journal article supplement (PMC9250623)

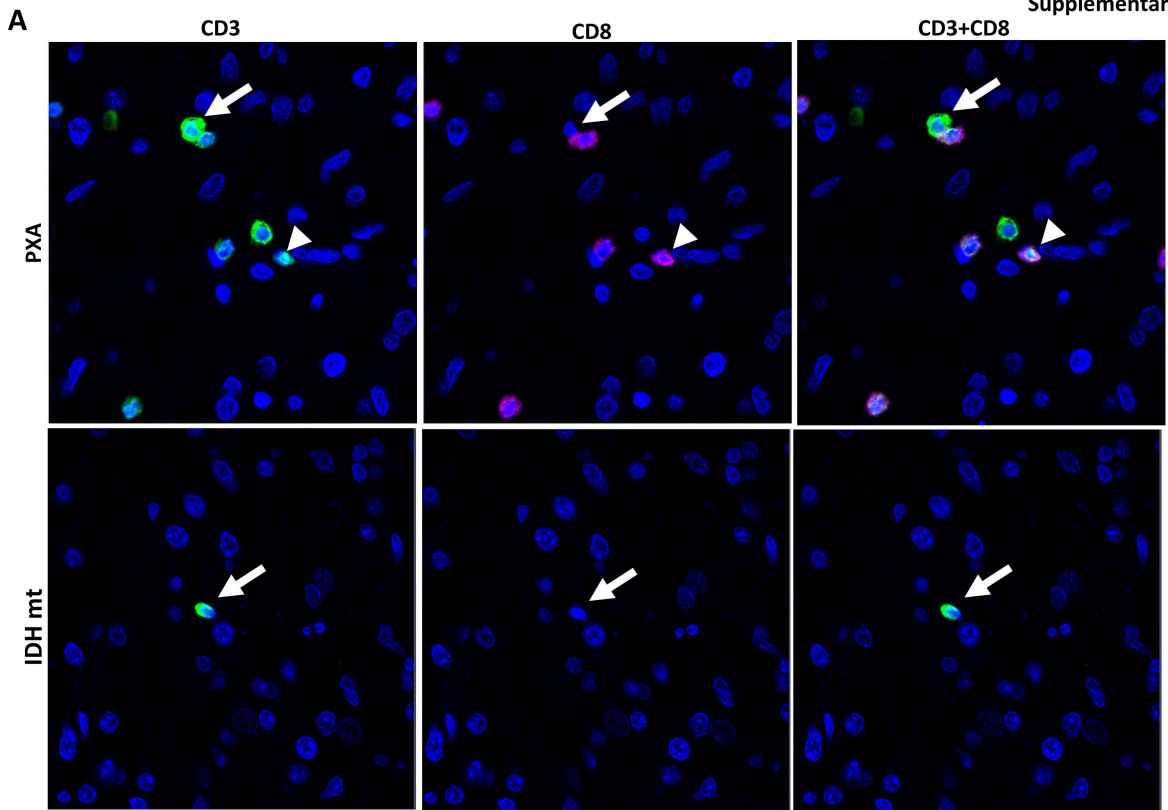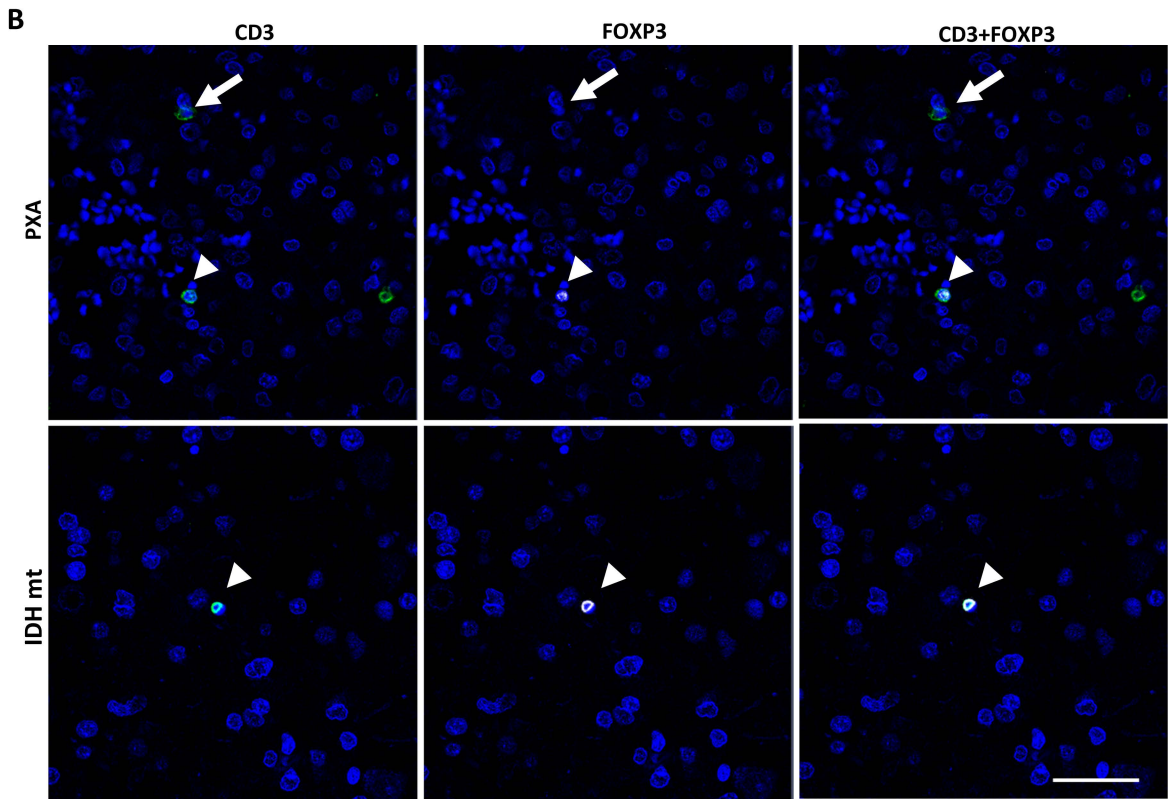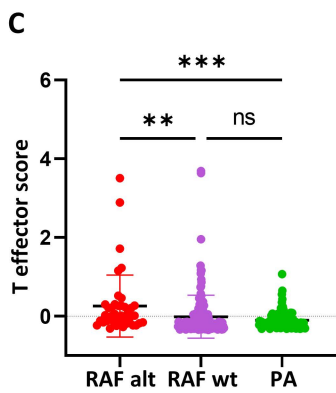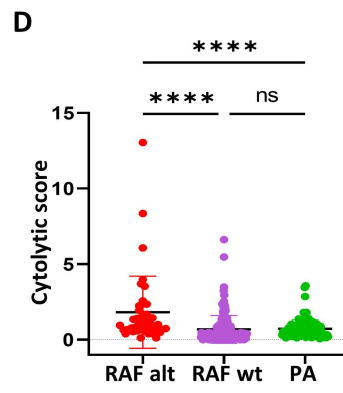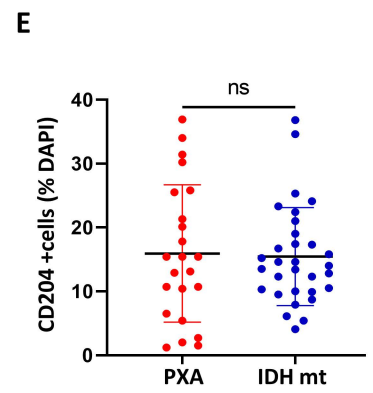

Supplement: NIHMS1807269-supplement-3.pdf [file NIHMS1807269-supplement-3.pdf]

A

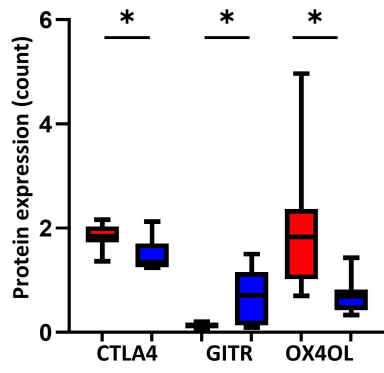

Supplement: NIHMS1807269-supplement-4.pdf [file NIHMS1807269-supplement-4.pdf]

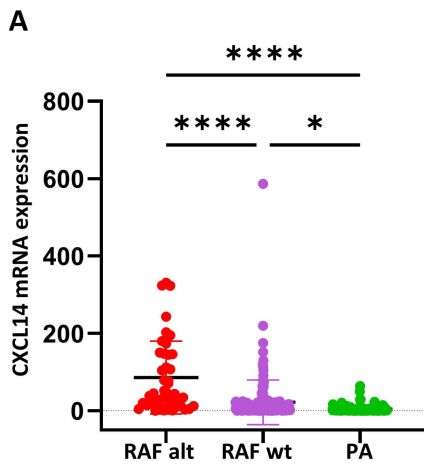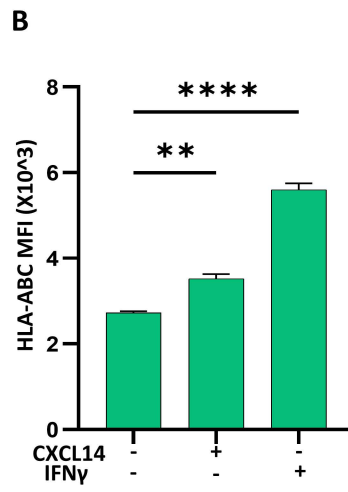

Supplement: NIHMS1807269-supplement-5.pdf [file NIHMS1807269-supplement-5.pdf]

**A**

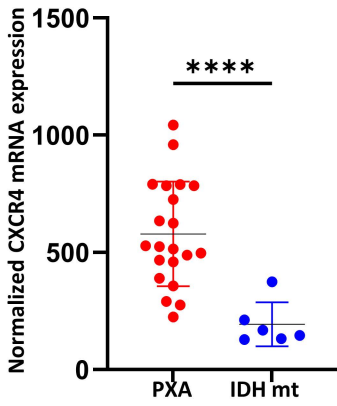

**B**

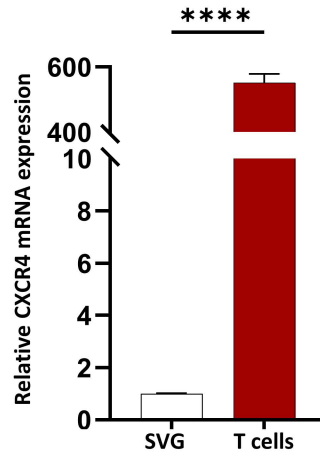

**C**

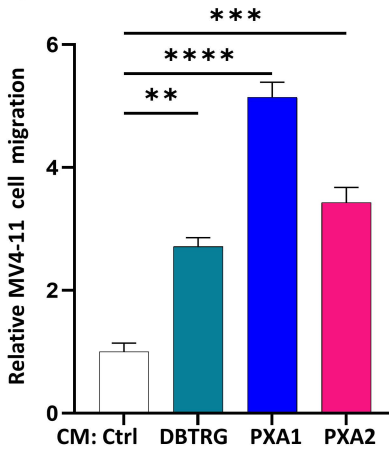

**D**

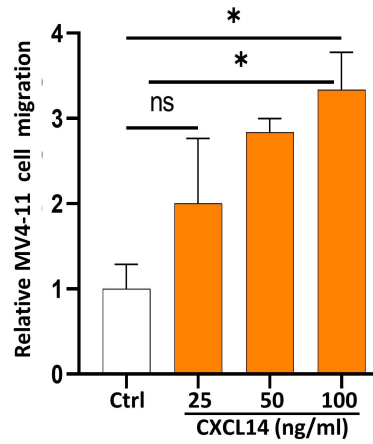

Supplement: NIHMS1807269-supplement-6.pdf [file NIHMS1807269-supplement-6.pdf]

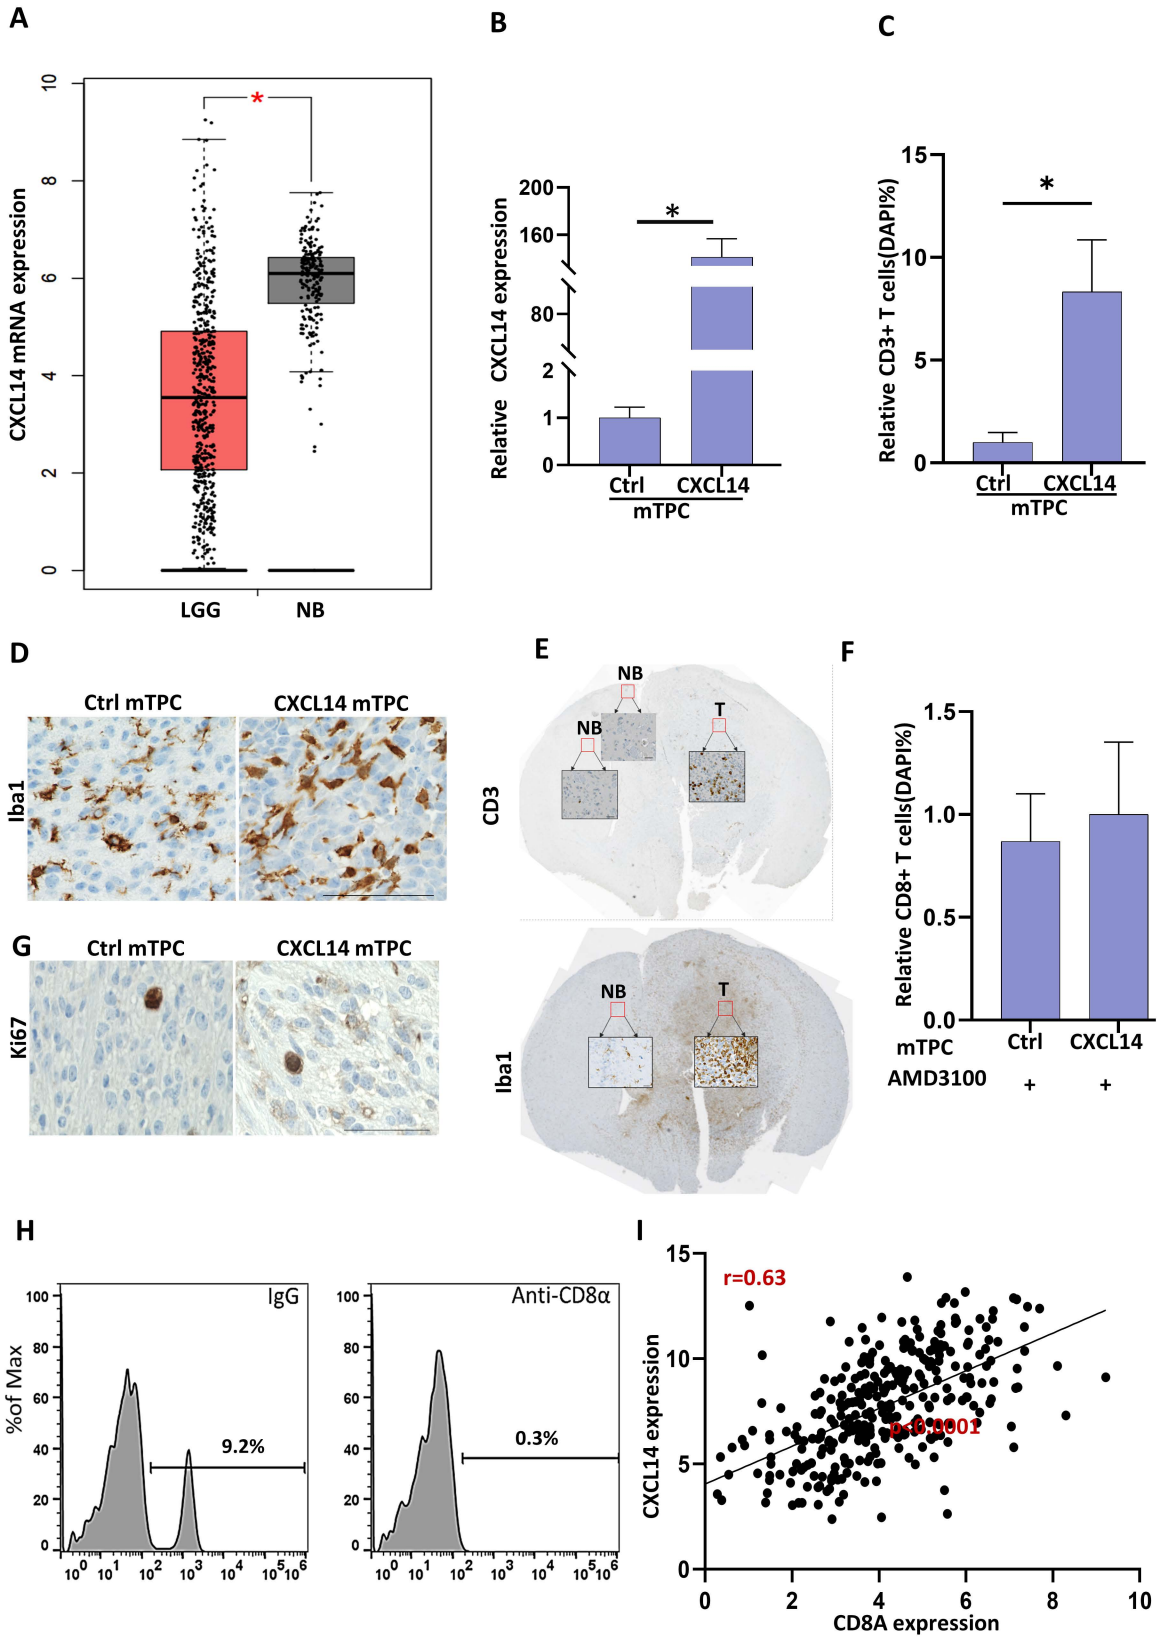

Supplement: NIHMS1807269-supplement-7.pdf [file NIHMS1807269-supplement-7.pdf]
